# Supplementary material for: Stepwise drying of Lake Turkana at the end of the African Humid Period: an example of forced regression modulated by solar activity?
Source: Copernicus journal article supplement (doi:10.5194/se-2016-95), 2016-07-20

1 **Stepwise drying of Lake Turkana at the end of the African Humid Period:**  
2 **a forced regression modulated by solar activity variations?**

3

4 **Alexis Nutz<sup>1</sup>, Mathieu Schuster<sup>1</sup>**

5 *Institut de Physique du Globe de Strasbourg (IPGS), UMR 7516, Centre National de la*  
6 *Recherche Scientifique, Université de Strasbourg, École et Observatoire des Sciences de la*  
7 *Terre, 1 rue Blessig, 67084 Strasbourg, France*

8 *\*Corresponding author ([nutz@unistra.fr](mailto:nutz@unistra.fr))*

9

10 **Running head:** Lake Turkana drying at the end of the AHP

11 **Keywords:** East African Rift System; Turkwel delta; Lake-level; Holocene; Solar activity

12 **Abstract**

13 Although timing of the termination of the African Humid Period (AHP) is now relatively  
14 well-established, modes and controlling factors are still being debated. Here, through a  
15 geomorphological approach, we characterize the evolution of the final regression of Lake  
16 Turkana at the end of the AHP. We show that lake level fall during this period was not  
17 continuous but stepwise and consisted of five episodes of rapid lake-level fall separated by  
18 episodes of slower rates of lake-level fall. Whereas the overall regressive trend can be  
19 attributed to decreasing regional precipitations due to the gradual reduction in northern  
20 hemisphere summer insolation controlled by orbital precession, we focus discussion on the  
21 origin of the five periods of accelerated lake-level fall. We propose that these are due to  
22 temporary reductions in rainfall across Lake Turkana area associated with repeated westward  
23 displacement of the Congo Air Boundary (CAB) during minima in solar activity.

24

## 25 **1. Introduction**

26 The African Humid Period (AHP), *c.* 14.8 to 5.5 ka cal BP, is a major climate period that was  
27 paced by orbital parameters (i.e. precession) (deMenocal et al., 2000; deMenocal and Tierney,  
28 2012; Bard, 2013; Shanahan et al., 2015) and that markedly impacted environment,  
29 ecosystems, and human occupation of Africa over several millennia (Bard, 2013). An increase  
30 in rainfall during this climate period led to the rise and highstand of numerous African lakes  
31 (Street and Grove, 1976; Tierney et al., 2011). The end of the AHP was characterized by the  
32 establishment of more arid conditions, leading to dramatic lake level falls (Street-Perrott and  
33 Roberts, 1983; Kutzbach and Street-Perrott, 1985). This aridification forced Neolithic  
34 populations to adapt to more limited resources (Kuper and Kröpelin, 2006) and represents a  
35 recent example of major climate change. The mid-Holocene termination of the AHP is  
36 thought to have been either abrupt (deMenocal et al., 2000), gradual (Kröpelin et al., 2008) or  
37 time-transgressive (Shanahan et al., 2015) depending on location, an ongoing debate  
38 highlighting the variable responses of proxies to dominant forcings and the complex  
39 interactions among the multiple components of the local environment (e.g., deMenocal,  
40 2000; Renssen et al., 2006; Liu et al., 2007; Tierney and deMenocal, 2013; Shanahan et al.,  
41 2015). However, drying trends remains poorly-constrained and as a consequence the final  
42 regressions of African lakes are presented at relative constant rate of lake level fall (e.g.,  
43 Garcin et al., 2012; Forman et al., 2014; Morrissey and Scholz, 2014; Junginger et al., 2014;  
44 Bloszies et al., 2015). In this study, we investigate the drying trend of Lake Turkana and  
45 evidence for the first time that the final regression was not continuous through time revealing  
46 a more complex process than previously envisaged. Thus, understanding the mode of African  
47 lake regressions appears as particularly relevant in the context of projecting future global  
48 climate change impacts on the African continent (e.g., Patricola and Hook, 2011), especially  
49 in term of evolution of water resources from large lakes.

50 Lake Turkana is one of the great lakes of the East African Rift. It is considered as a  
51 Wind-driven Waterbody (Nutz et al., in press) that developed abundant wave-dominated  
52 coastal features all along its shoreline. These coastal features represent a valuable  
53 paleohydrological archives that contributes to the understanding of the evolution of Lake  
54 Turkana during the AHP (Garcin et al., 2012, Forman et al., 2014; Bloszies et al., 2015).  
55 However, the detailed and continuous evolution of lake level during the final forced  
56 regression (i.e., basinward migration of the shoreline associated with a base-level fall)  
57 marking the end of the AHP has not been already documented. Here, the delta complex of the  
58 Turkwel River (Fig. 1) that developed during the final forced regression of Lake Turkana is  
59 examined using trajectory analysis (Helland-Hansen and Hampson, 2009). Finally, we  
60 highlight variations in the rate of lake level fall during the regression. We interpret those  
61 variations as markers reflecting variable rate of decrease in precipitation during the crucial  
62 period corresponding to the terminal phase of the AHP. Subsequently, we discuss potential  
63 forcings responsible for the regressive pattern of Lake Turkana with a primary focus on the  
64 role of the Sun and short-term variability of insolation.

65

## 66 **2. Materials and methods**

67 The data set is comprised of satellite imagery and a digital elevation model (DEM). A  
68 recently obtained SRTM1 (Shuttle Radar Topography Mission (Rabus et al., 2003)) is  
69 available for the entire Lake Turkana area. This DEM is produced by radar interferometry  
70 with a one arcsec (approximately 30 m) horizontal grid spacing and an approximately 5 m  
71 absolute vertical error (Rosen et al., 2001; Tighe and Chamberlain, 2009). In addition, high-  
72 resolution (<1 m) PLEIADES and (5 m) SPOT 5 images (©CNES 2012, Airbus DS/ SPOT  
73 Image) were used to focus on selected areas. This data set was processed using GIS software  
74 (Global Mapper 15 software; Blue Marble Geographics, Hallowell, ME, USA) to provide a

75 high-resolution 3D view of the geomorphological features. Topographic profiles, elevation  
76 differences, and slope values used for the trajectory analyses were obtained using Global  
77 Mapper 15 software.

78

### 79 **3. Chronological framework**

80 Humid conditions related to the AHP broadly prevailed over Africa from 14.8 to 5.5 ka cal  
81 BP (deMenocal et al., 2000; Shanahan et al., 2015). Several lake level curves associated with  
82 Lake Turkana evolution provide records of the regional moisture history over the Holocene  
83 (Garcin et al., 2012; Forman et al., 2014; Bloszies et al., 2015). Based on surveys of raised  
84 Holocene beach ridges coupled with dated archeological sites, these studies provide a  
85 relatively robust chronological framework for the final regression at the end of the AHP.  
86 Garcin et al. (2012) initially estimated the onset of the final lake level fall in Lake Turkana at  
87 *c.*  $5.27 \pm 0.36$  ka cal BP. Subsequently, Forman et al. (2014) proposed that the age of this  
88 final regression occurred between 5.5/5.0 to 4.6 ka cal BP associated with a lake level change  
89 from 440 to 380 m asl. Finally, Bloszies et al. (2015) proposed an onset of the final regression  
90 of the AHP starting at  $5.18 \pm 0.12$  ka cal BP (dating of a shell at 90 m above the modern Lake  
91 Turkana) and finishing at  $4.58 \pm 0.25$  ka BP (OSL age reused from Forman et al., 2014;  
92 sample UIC2319) associated with a lake level grading from 450 to 375 m asl. Based on these  
93 published data, we carried out minor complementary processing in order to refine the  
94 chronology. First, we recalibrated sample (SNU12-589) considered to provide the age of the  
95 onset of the final regression. Using a most recent curve (INTCAL13; Reimer et al., 2013), the  
96 onset of the final regression is now given at  $5.14 \pm 0.18$  ka cal BP ( $4.51 \pm 0.06$  ka  $^{14}\text{C}$  BP).  
97 Second, we converted the OSL age ( $4.58 \pm 0.25$  ka BP; sample OSL23/1.30) that is considered  
98 to represent the end of the final regression (Forman et al., 2014) in radiocarbon age. Indeed,  
99 Forman et al. (2014) provided 6 samples that were dated by both OSL and radiocarbon



100 methods. Even the limited number of samples, we then processed a linear regression in order  
101 to propose a statistic relationship between OSL and radiocarbon ages. At the end, based on  
102 this correlation ( $\text{age}_{(\text{OSL})} = 0.98386063 * \text{age}_{(^{14}\text{C}(\text{calibrated}))}$ ; b( the intercept) has been forced to 0;  
103  $r^2 = 0.9942$ ), the age of the end of the final regression is now estimated at  $4.65 \pm 0.3$  ka cal BP  
104 ( $4.14 \pm 0.24$  ka  $^{14}\text{C}$  BP). As such, based on this most recent available age-model, the final  
105 regression of Lake Turkana at the end of the AHP would, at the longest, span a period from  
106 5.32 to 4.35 ka cal BP. At a minimum, the final regression would have occurred between 4.96  
107 and 4.95 ka cal BP. This implies a duration ranging between 10 to 1030 years, with a mean  
108 duration of 510 years for water level to decrease from the Holocene highstand (450 m asl) to  
109 the lowstand (375 m asl). Considering the largest potential time interval during which the  
110 final regression occurred (i.e., interval between 4.57 and 3.90 ka  $^{14}\text{C}$  BP ), a mean age of  $4.23$   
111  $\pm 0.33$  ka  $^{14}\text{C}$  BP is established in order to allow a calibration and then to provide a  
112 probability curve. At the end, calibration reveals a 44% of probability that the final regression  
113 precisely occurred between  $5.14 \pm 0.18$  and  $4.65 \pm 0.3$  ka cal BP. Because the investigated  
114 portion of the Turkwel delta is located between 450 and 375 m asl, ages of the landforms are  
115 considered to have developed between  $5.14 \pm 0.18$  and  $4.65 \pm 0.3$  ka cal BP.

116

#### 117 **4. Geomorphological analysis**

118 The Turkwel delta complex is 35 km long, forming one of the major deltaic systems that  
119 fringed Lake Turkana during the Holocene (Fig. 1). It was developed as the shoreline  
120 migrated basinward, lowering from 450 to 360 m asl (Fig. 2). From west to east, five distinct  
121 progradational stages were identified (Fig. 2d). The first progradational stage forms a lobe  
122 protruding out from the mean north–south paleoshoreline, well defined by the 450 m asl  
123 elevation shoreline (red line in Fig. 2d). According to regional age models (Garcin *et al.*,  
124 2012; Forman *et al.*, 2014; Bloszies *et al.*, 2015), this first progradational stage marks the last

125 Holocene highstand before the end of the AHP. Moving eastward, each of the three  
126 topographic profiles cross-cutting the Turkwel delta complex (Fig. 3) shows five slightly  
127 inclined plateaus interrupting at *c.* 445, 425, 410, 400 and 390 m asl, respectively, separated  
128 by five abrupt 5-to 15-m-high steps (Fig. 4). Each plateau defines a different progradational  
129 stage. The plateaus are 3- to 5-km-wide, and correspond to successively abandoned delta  
130 plains (Fig. 2d). To the north, these plateaus systematically end with paleo-spits that  
131 document ancient, northward-flowing alongshore currents. The resulting landform reveals the  
132 Turkwel delta complex as composed of successive asymmetric wave-dominated deltas  
133 (Bhattacharya and Giosan, 2003; Anthony 2015) during most of its evolution, except in the  
134 early period associated with the AHP highstand. None of the plateaus exhibit any evidence of  
135 significant erosion that would indicate reworking of the landforms subsequent to their  
136 deposition, except for the fluvial incision of the Turkwel River that progressively adjusted to  
137 the base level fall. This supports the Turkwel delta complex as a primary depositional  
138 landform corresponding to a continuous, comprehensive record of lake level evolution.  
139 Trajectory analysis, performed for the three transects that cross-cut the Turkwel delta complex  
140 along its progradation axis (Fig. 3), reveals that the plateaus are continuous, having slightly  
141 descending regressive trajectories (slope gradient:  $>0^\circ$  to  $0.4^\circ$ ). The five abrupt steps that  
142 separate plateaus have much higher slope gradients ( $1^\circ$  to  $3.8^\circ$ ), and are also defined as  
143 descending regressive trajectories. Trajectories reflect a progradation associated with a  
144 general lake level fall that meets the definition of a forced regression (Posamentier *et al.*,  
145 1992). Moreover, the five abrupt steps reflect recurrent, short-lived increases in the rate of  
146 lake level fall that evidence a stepwise forced regression at the end of the AHP. In order to  
147 confirm this interpretation, we investigated another portion of the Lake Turkana  
148 paleoshoreline. In the eastern Omo River valley (Fig. 1), topographic profiles along two fossil  
149 spits are presented (Fig. 5). The two spit systems show successive plateaus at elevations (*c.*

150 445, 425, 410 and 400 m asl) similar to those observed in the Turkwel delta complex (Fig. 3).  
151 Finally, these additional observations firmly support the reconstructed evolution of lake level  
152 deduced from the Turkwel delta complex. The overall trend of the three transects in the  
153 Turkwel delta as well as transects in the fossil spits of the eastern Omo River valley lend  
154 support to the idea of a stepwise final, forced regression of Lake Turkana at the end of the  
155 AHP.

156

## 157 **5. Discussion**

### 158 **5.1. Origin of Lake Turkana lake level evolution**

159 Lake level fluctuations may result from changes in the quantity of water supply to a lake,  
160 from altered evapotranspiration rates within the catchment area, or from modifications in  
161 basin physiography. These changes may originate from a number of potential external  
162 forcing processes, among which the most commonly considered are tectonism and climate.  
163 Tectonism may be ruled out as the origin of any physiographic modification of the Lake  
164 Turkana basin that would have caused abrupt falls in lake level at such time-scale. Vertical  
165 crustal movements occur over much longer time periods than that of the AHP termination and  
166 the rate of subsidence in the basin is too low (i.e.  $0.4 \text{ m}\cdot\text{ka}^{-1}$  at the Eliye Spring well site  
167 (Morley *et al.*, 1999)), to explain several lake level falls of  $>5$  m each in maximum 1000  
168 years. Moreover, vertical displacements at this scale would require earthquakes having a  
169 magnitude  $>9$  (Pavrides and Caputo, 2004). Earthquakes of this magnitude are unknown in  
170 the area and are not compatible with rift systems. Finally, volcanism event is known to have  
171 occurred (Karson and Curtis, 1994) during the Late Quaternary even the age is not very-well  
172 constrained. However, repeated pulsed of accelerated subsidence related to successive  
173 emptying of a magma chamber is prevented by the insufficient amount of magma observed in  
174 the basin. Indeed, no regional magmatic effusion that would have caused sudden subsidence

175 is observable. Magmatism rather corresponds to punctual effusion forming the north, central,  
176 and south islands. As such, the abrupt nature of the accelerated lake level falls can be  
177 attributed only with difficulty to tectonics and magmatism leaving climate variability as the  
178 most likely forcing mechanism.

179         During the Holocene, the overall climate pattern in East Africa was governed by  
180 insolation changes related to changes in precessional orbital parameters of the Earth (Barker  
181 et al., 2004). Links between insolation and hydrology are now well established for this region,  
182 in particular monsoonal rainfall intensity that is strongly correlated with summer insolation  
183 (deMenocal et al., 2000; Shanahan et al., 2015). In the early Holocene, an increase in summer  
184 insolation due to changing orbital parameters produced wetter conditions over much of the  
185 African continent leading to the establishment of the AHP. Subsequently, the overall  
186 contraction of lakes at the end of the AHP is generally attributed to decreased precipitation  
187 related to a reduction of summer insolation (deMenocal et al., 2000; Shanahan et al., 2015)  
188 controlled by orbital parameters (i.e. precessional forcing; deMenocal and Tierney, 2012;  
189 Bard, 2013). Therefore, changes in insolation imply additional modifications in rainfall  
190 amounts through the strengthening or weakening of local climate processes. In the Lake  
191 Turkana area, Junginger et al. (2014) suggest that the increase of precipitation during the AHP  
192 is mainly a result of a north-eastward shift of the Congo Air Boundary (CAB). The CAB is a  
193 north-east to south-west oriented convergence zone presently located west of the Lake  
194 Turkana area. This convergence zone shifts eastward in response to an enhanced atmospheric  
195 pressure gradient between India and East Africa during northern hemisphere insolation  
196 maxima (Junginger and Trauth, 2013; Junginger et al., 2014). When the CAB moves eastward  
197 over the Turkana area, precipitation is expected to increase significantly. Because the five  
198 abrupt accelerations in lake level fall require short-term accentuated decreases in  
199 precipitation, we propose that these five periods of significantly reduced rainfall amounts are

200 related to short-term decreases of insolation that repeatedly moved the CAB position. At such  
201 decadal to centennial time-scale, variations of solar activity appear as the most likely acting  
202 parameter to explain variations in insolation. This potential origin needs to be discussed.

203

## 204 **5.2. Linking solar activity and paleohydrology**

205 Links between short-term (decadal-scale) solar activity and climate change remains a point of  
206 debate. However, periodicities in solar activity such as the 11-year sunspot cycle, the  
207 Gleissberg cycle (80—90 years) (Peristykh and Damon, 2003) or the de Vries cycle (~200  
208 years) (Raspopov et al., 2008) have been identified in Holocene paleoenvironmental records  
209 and suggests a possible forcing by solar activity on climate (Crowley, 2000; Bond et al., 2001;  
210 Gray et al., 2013). Especially in Lake Turkana, the potential expression of the 11-year sunspot  
211 cycle has already been deciphered through time-series analysis for sediments associated with  
212 the last 4 ka (Halfman et al., 1994). Within some African lakes, several authors link more arid  
213 periods with solar activity minima (Stager et al., 2002 and Junginger et al., 2014) and Lake  
214 Turkana is one of them. The capacity of those lakes to record changes in paleohydrology  
215 attributed to variations in solar activity may rely to the fact that these lakes are very sensitive.  
216 Indeed, they are considered as “amplifier lakes” (Street-Perrott and Harrison, 1985) for which  
217 relatively modest changes in climate are amplified into significant lake-level fluctuation due  
218 to their specific morphology. As an amplifier lake, Lake Turkana could be more sensitive to  
219 precipitation changes from small variations in insolation as those generated by modifications  
220 in solar activity.

221 Coupling the proposed chronological framework with the solar activity curve from  
222 Steinhilber et al. (2009), we observed in the Lake Turkana between two and ten solar activity  
223 minima during the minimum and maximum potential period of regression, respectively  
224 (Fig.6). Considering a mean time of 510 years given by the age-model during which the final

225 regression occurred, five solar activity minima are observed. The number of these minima  
226 interestingly matched with the number of abrupt lake level falls suggesting a possible link  
227 between the short-term variability of solar activity and the lake level changes in Lake Turkana  
228 at the end of the AHP. Because a mechanism must be given, we propose that periods of solar  
229 activity maxima would be able to compensate for the precession-induced reduction of  
230 insolation. The relatively limited reduction of insolation would have led to a relatively stable  
231 position for the CAB over the Lake Turkana area and, in turn, a reduced rate of lake level fall  
232 due to slowly decreased precipitation amounts. However, when short-term solar activity  
233 minima are coupled with the precession-related insolation decrease, the CAB would have  
234 migrated rapidly westward resulting in drastic reduction of rainfall and as a consequence, a  
235 rapid fall in lake level. As such, alternations of solar activity maxima and minima could  
236 explain the geomorphological pattern that revealed a long-term fall in lake level interspersed  
237 by short-term accelerations in the rate of lake level fall during the final forced regression at  
238 the end of the AHP.

239

## 240 **6. Conclusion**

241 Geomorphic analysis (i.e. trajectory analysis) revealed for the first time a stepwise lake level  
242 fall of Lake Turkana during its final forced regression at the end of the AHP. Five rapid falls  
243 in lake level were identified, intercalated with periods of slower lake level fall. We suggest  
244 that the abrupt, short-term accelerations of lake level fall may be associated with insolation  
245 minima altering the position of the CAB, responsible for regional precipitation pattern. Our  
246 interpretation suggests that short-term variability of insolation, due to variability in solar  
247 activity, may have influenced the hydroclimatic conditions in the Turkana area during the  
248 final forced regression of the AHP. Next step would be to correlate each paleo plateaus to a

249 specific solar maxima and each step to a specific minima. Nevertheless, uncertainties of  
250 dating methods will allow only with difficulty to provide enough precise ages for such  
251 features developed at the decadal to centennial time-scale.

252

## 253 **Acknowledgements**

254 This work is a contribution of the Rift Lake Sedimentology project (RiLakS) funded by Total  
255 Oil Company. Satellite images (SPOT and PLEIADES) were acquired thanks to the support  
256 of CNES/ISIS program. Finally, we are grateful to Murray Hay (Maxafeau Editing Services)  
257 for verification of the English text.

258

## 259 **References**

- 260 Anthony, E.J.: Wave influence in the construction, shaping and destruction of river, *Mar.*  
261 *Geol.* 361, 53–78, 2015.
- 262 Bard, E.: Out of the African Humid Period, *Science*, 342, 808–809, 2013.
- 263 Barker, P.A., Talbot, M.R., Street-Perrott, F.A., Marret, F., Scourse, J. and Odada, E.O.: Late  
264 Quaternary climatic variability in intertropical Africa, in: *Past Climate Variability through*  
265 *Europe and Africa* (R.W. Battarbee, F. Gasse, C.E. Strickley, eds) Springer, Dordrecht,  
266 2004.
- 267 Bhattacharya, J.P. and Giosan, L.: Wave-influenced deltas: geomorphological implications for  
268 facies reconstruction, *Sedimentology*, 50, 187–210, 2003.
- 269 Bloszies, C., Forman, S.L. and Wright, D.K.: Water level history for Lake Turkana, Kenya in  
270 the past 15,000 years and a variable transition from the African Humid Period to Holocene  
271 aridity, *Glob. Planet. Change*, 132, 64–76, 2015.
- 272 Bond, G., Kromer, B., Beer, J., Muscheler, R., Evans, M.N., Showers, W., Hoffman, S., Lotti-  
273 Bond, R., Hajdas, I. and Bonani, G.: A pervasive millennial-scale cycle in North Atlantic  
274 Holocene and glacial climates, *Science*, 278, 1257–1266, 2001.
- 275 Crowley, T.: Causes of climate change over the past 1000 years, *Science*, 289, 270–277,  
276 2000.

277 deMenocal, P.B. and Tierney, J.E.: Green Sahara: African Humid Periods paced by Earth's  
278 orbital changes, *Nature Educ. Knowl.*, 3, 12, 2012.

279 deMenocal, P.B., Ortiz, J., Guilderson, T., Adkins, J., Sarnthein, M., Baker, L. and  
280 Yarusinsky, M.: Abrupt onset and termination of the African Humid Period: rapid climate  
281 responses to gradual insolation forcing, *Quat. Sci. Rev.*, 19, 347–361, 2000.

282 Forman, S.L., Wright, D.K. and Bloszies, C.: Variations in water level for Lake Turkana in  
283 the past 8500 years near Mt. Porr, Kenya and the transition from the African Humid Period  
284 to Holocene aridity, *Quat. Sci. Rev.*, 97, 84–1014, 2014.

285 Garcin, Y., Melnick, D., Strecker, M.R., Olago, D. and Tiercelin, J.-J.: East African mid-  
286 Holocene wet-dry transition recorded in palaeo-shorelines of Lake Turkana, northern  
287 Kenya Rift, *Earth Planet. Sci. Lett.*, 331–322, 322–334, 2012.

288 Gray, L., Scaife, A.A., Mitchell, D.M., Osprey, S., Ineson, S., Hardiman, S., Butchart, N.,  
289 Knight, R., Sutton, R., and Kodera, K.: A lagged response to the 11-year solar cycle in  
290 observed winter Atlantic/European weather patterns, *J. Geophys. Res.*, 118, 13405–13420,  
291 2013.

292 Halfman, J.D., Johnson, T.C. and Finney, B.P.: AMS dates, stratigraphic correlations and  
293 decadal climatic cycles for the past 4 ka at Lake Turkana, Kenya, *Palaeogeog.*  
294 *Palaeoclimatol. Palaeoecol.*, 111, 83-98, 1994

295 Helland-Hansen, W. and Hampson, G.: Trajectory analysis: concepts and application, *Basin*  
296 *Res.*, 21, 454–483, 2009.

297 Junginger, A., Roller, S., Olaka, L.A. and Trauth, M.H.: The effects of solar irradiation  
298 changes on the migration of the Congo Air Boundary and water levels of paleo-Lake  
299 Suguta, Northern Kenya Rift, during the African Humid Period (15–5 ka BP), *Palaeogeog.*  
300 *Palaeoclimatol. Palaeoecol.*, 396, 1–16, 2014.

301 Junginger, A. and Trauth, M.H.: Hydrological constraints of paleo-Lake Suguta in the  
302 Northern Kenya Rift during the African Humid Period (12–5 ka BP), *Glob. Planet.*  
303 *Change*, 111, 174–188, 2013.

304 Karson, J.A., and Curtis, P.C.: Quaternary volcanic centres of the Turkana Rift, Kenya:  
305 *Journal of African Earth Sciences*, 18, 15–35, 1994.

306 Kröpelin, S., Verschuren, D., Lézine, A.-M., Eggermont, H., Cocquyt, C., Francus, P., Cazet,  
307 J.-P., Fagot, M., Rumes, B., Russell, J.M., Darius, F., Conley, D.J., Schuster, M., von  
308 Suchodoletz, H. and Engstrom, D.R., : Climate-driven ecosystem succession in the Sahara:  
309 The past 6000 years, *Science*, 320, 765–768, 2008.

310 Kutzbach, J.E., and Street-Perrott, F.A.: Milankovitch forcing of fluctuations in the level of  
311 tropical lakes from 18 to 0 kyr BP, *Nature*, 317, 130–134, 1985.

312 Kuper, R. and Kröpelin, S.: Climate-controlled Holocene occupation in the Sahara: Motor of  
313 Africa's evolution, *Science*, 313, 803–807, 2006.

314 Liu, Z., Wang, Y., Gallimore, R., Gasse, F., Johnson, T., deMenocal, P., Adkins, J., Notaro,  
315 M., Prentice, I.C., Kutzbach, J., Jacob, R., Behling, P., Wang, L. and Ong, E.: Simulating



316 the transient evolution and abrupt change of Northern Africa atmosphere-ocean-terrestrial  
317 ecosystem in the Holocene, *Quat. Sci. Rev.*, 26, 1818–1837, 2007.

318 Morley, C.K., Karanja, F.M., Wescott, W.A., Stone, D.M., Harper, R.M., Wigger, S.T. and  
319 Day, R.A.: Geology and geophysics of the western Turkana basins, Kenya. *Am. Assoc.  
320 Petrol. Geol.*, 44, 19–54, 1999.

321 Morrissey, A., and Scholz, C.A.: Paleohydrology of Lake Turkana and its influence on the  
322 Nile River system: *Palaeogeog. Palaeoclimatol. Palaeoecol.*, 403, 88–100, 2014.

323 Nutz A., Schuster, M., Ghienne, J-F., Roquin C and Bouchette F, accepted in *Journal of*  
324 *Paleolimnology*, special publication ILIC 6. Wind-driven Waterbodies: A new category of  
325 lake within an alternative sedimentologically-based lake classification.

326 Patricola, C.M. and Hook, K.H.: Sub-Saharan Northern African climate at the end of the  
327 twenty-first century: Forcing factors and climate change processes, *Clim. Dyn.*, 37, 1165–  
328 1188, 2011.

329 Pavlides, S. and Caputo, R.: Magnitude versus faults' surface parameters: quantitative  
330 relationships from the Aegean Region. *Tectonophysics*, 380, 159–188, 2004.

331 Peristykh, A.N. and Damon P.E.: Persistence of the Gleissberg 88-year solar cycle over the  
332 last 12 000 years: Evidence from cosmogenic isotopes, *J. Geophys. Res.*, 108, A1, 2003.

333 Posamentier, H.W., Allen, G.P., James, D.P. and Tesson, M.: Forced regressions in a  
334 sequence stratigraphic framework: concepts, examples, and exploration significance. *Am.  
335 Assoc. Petrol. Geol. Bull.*, 76, 1687–1709, 1992.

336 Rabus, B., Eineder, M., Roth, A. and Bamler, A.: The shuttle radar topography mission - a  
337 new class of digital elevation models acquired by spaceborne radar. *ISPRS J. Photogram.  
338 Rem. Sens.*, 57(4), 241–262, 2003.

339 Raspopov O.M., Dergachev, V.A., Esper, J., Kozyreva, O.V., Frank, D., Ogurtsov, M.,  
340 Kolström, T. and Shao, X.: The influence of the de Vries (200-years) solar cycle on  
341 climate variations: Results from the Central Asian Mountains and their global link,  
342 *Palaeogeog. Palaeoclimatol. Palaeoecol.*, 259, 6–16, 2008.

343 Reimer, P.J., Bard, E., Bayliss, A., Beck, J.W., Blackwell, P.G., Bronk Ramsey, C., Buck,  
344 C.E., Cheng, H., Edwards, R.L., Friedrich, M., Grootes, P.M., Guilderson, T.P.,  
345 Haflidason, H., Hajdas, I., Hatté, C., Heaton, T.J., Hoffmann, D.L., Hogg, A.G., Hughen,  
346 K.A., Kaiser, K.F., Kromer, B., Manning, S.W., Niu, M., Reimer, R.W., Richards, D.A.,  
347 Scott, E.M., Southon, J.R., Staff, R.A. and Turney, C.S.M., *INTCAL13 and MARINE13*  
348 *radiocarbon age calibration curves, 0-50,000 years Cal BP: Radiocarbon*, 55, 1869-1887,  
349 2013

350 Renssen, H., Brovkin, V., Fichet, T. and Goosse, H.: Simulation of the Holocene climate  
351 evolution in Northern Africa: The termination of the African Humid Period, *Quat. Inter.*,  
352 150, 95–102, 2006.

353 Shanahan, T.M., McKay, N.P., Hughen, K.A., Overpeck, J.T., Otto-Bliesner, B., Heil, C.W.,  
354 King, J., Scholz, C.A. and Peck, J.: The time-transgressive termination of the African  
355 Humid Period, *Nature Geosci.*, 8, 140–144, 2015.

356 Stager, J.C., Mayewski, P.A. and Meeker, L.D.: Cooling cycles, Heinrich event 1, and the  
357 desiccation of Lake Victoria, *Palaeogeog. Palaeoclimat. Palaeoecol.*, 183, 169–178, 2002.

358 Tighe, M.L. and Chamberlain, D.: Accuracy comparison of the SRTM, ASTER, NED,  
359 NEXTMAP USA digital terrain model over several USA study sites, ASPRS/MAPPS Fall  
360 Conference, November 16-19, 2009.

361 Steinhilber, F., Beer, J. and Fröhlich, C.: Total solar irradiance during the Holocene, *Geophys.*  
362 *Res. Lett.*, 36, L19704, 2009.

363 Street-Perrott, F.A. and Harrison, S.P.: Lake levels and climate reconstruction, *Paleoclimate*  
364 *analysis and modeling*, 291–340, 2009, 1985.

365 Street-Perrott, F.A. and Roberts, N.: Fluctuations in closed basin lakes as indicators of past  
366 atmospheric circulation patterns, in: Street-Perrott, F.A., Beran, M., and Ratcliffe, R.A.S.,  
367 ed., *Variations in the global water budget*: Dordrecht. Reidel. 331–345, 1983

368 Street, F.A. and Grove, A.T.: Environmental and climatic implications of late Quaternary lake  
369 level fluctuations in Africa, *Nature*, 261, 385–390, 1976.

370 Tierney, J.E. and deMenocal, P.: Abrupt shifts in Horn of Africa hydroclimate since the Last  
371 Glacial Maximum, *Science*, 342, 843–846, 2013.

372 Tierney, J.E., Lewis, S.C., Cook, B.I., LeGrande, A.N. and Schmidt, G.A.: Model, proxy and  
373 isotopic perspectives on the East African Humid Period, *Earth Planet. Sci. Lett.*, 307, 103–  
374 112, 2011.

375

## 376 **FIGURE CAPTIONS**

377 Figure 1. Location maps. (a) Lake Turkana basin in the East African Rift System (EARS). (b)  
378 Digital elevation model (DEM) SRTM1 showing Lake Turkana and the two considered areas  
379 (Turkwel delta and the east side of the Omo River valley). Dashed white line represents the  
380 maximum Holocene lake level. All described geomorphological features are located between  
381 the paleolake limit and the modern lakeshore.

382 Figure 2. Turkwel delta complex. (a) Raw digital elevation model SRTM1 of the Turkwel  
383 delta. (b) Slope direction shading applied to the DEM SRTM1 of the Turkwel delta to  
384 highlight the steps separating the different plateaus. Markers display the correspondence

385 between the DEM SRTM1 and the slope direction shading (see (a)). (c) SPOT5 satellite  
386 image of the Turkwel delta. (d) Interpretative geomorphological map of the area showing five  
387 successive delta plains in addition to the oldest plain associated with the late AHP highstand.

388 Figure 3. Geomorphological data for the Turkwel delta complex. (a) SRTM1 images were  
389 processed to display a digital elevation model of the Turkwel delta complex. Locations of the  
390 topographic transects are presented. (b) Topographic transects P1, P2, and P3. (c) Trajectory  
391 analyses show that the overall forced regressive trend ( $>0^\circ$  to  $0.4^\circ$ ) is punctuated by five  
392 steeper slopes ( $1^\circ$  to  $3.8^\circ$ ) revealing short-term increases in the rates of lake level fall.

393 Figure 4. Landforms from Turkwel delta. (a) Front view of a step grading downward to a  
394 plateau. (b) Side view of the same step separating two plateaus.

395 Figure 5. Sandspit systems, outlined by dashed white lines, along the eastern Omo River  
396 valley (location Fig.1b) from SRTM 1 (left side) and from PLEIADES images (right side).  
397 The sandspits display plateaus having similar elevations as those of the Turkwel delta.

398 Figure 6. The red curve presents total solar irradiance (40-year moving average) relative to the  
399 value of the PMOD composite during the solar cycle minimum of the year 1986 (1365.57  
400  $W.m^2$ ) (Steinhilber et al., 2009) for the period contemporaneous with AHP regression of Lake  
401 Turkana. The shaded band represents  $1\sigma$  uncertainty. The blue curve represents the  
402 precessional curve covering the same time period  
403 (<http://www.imcce.fr/Equipes/ASD/insola/earth/online/>). Grey stripes highlight solar activity  
404 minima.

405

406

407

408

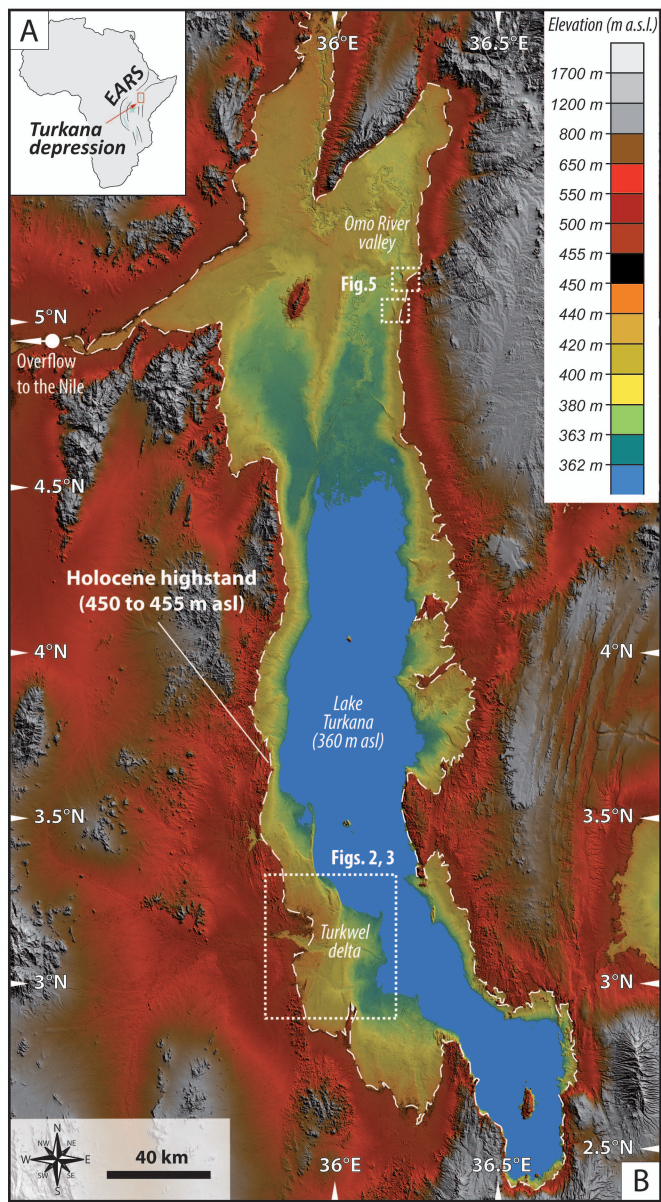



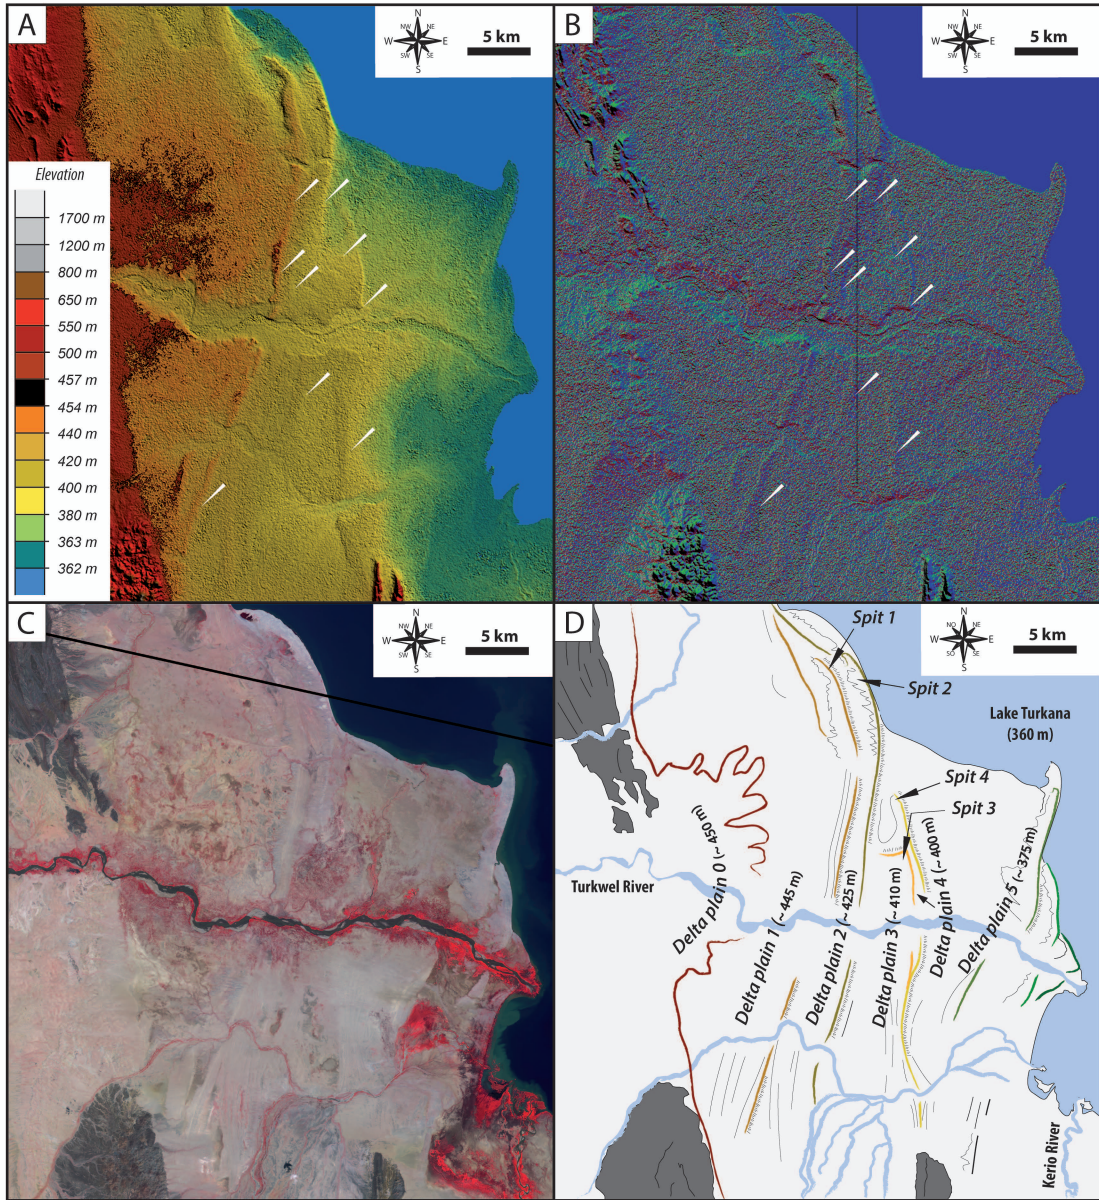

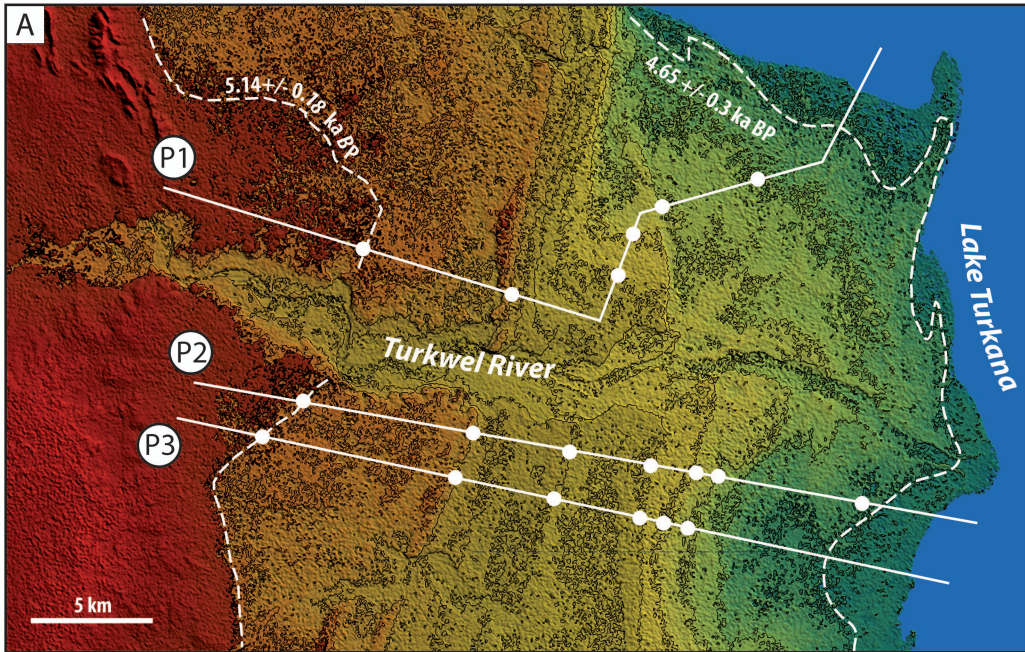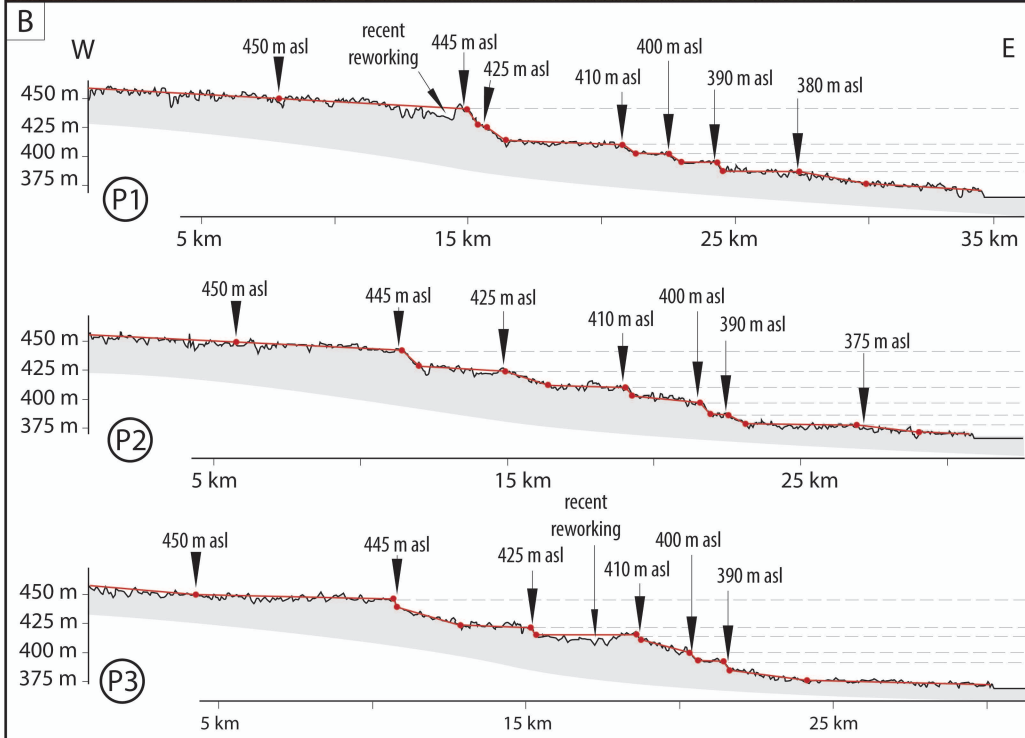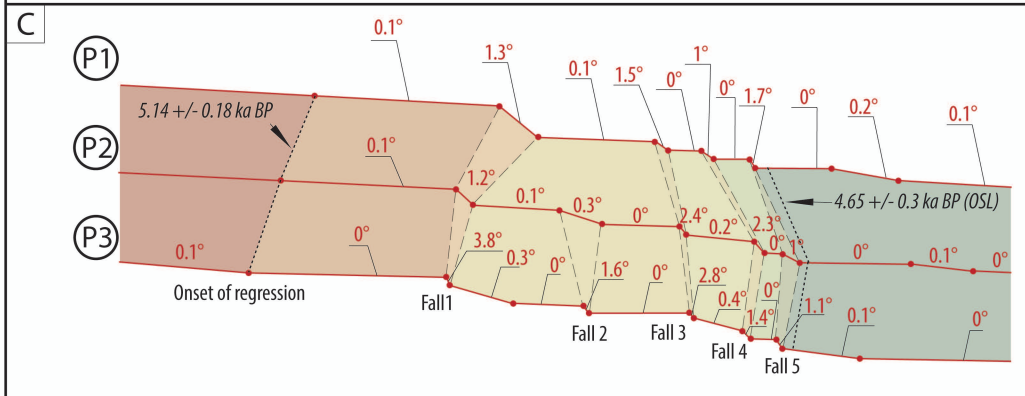



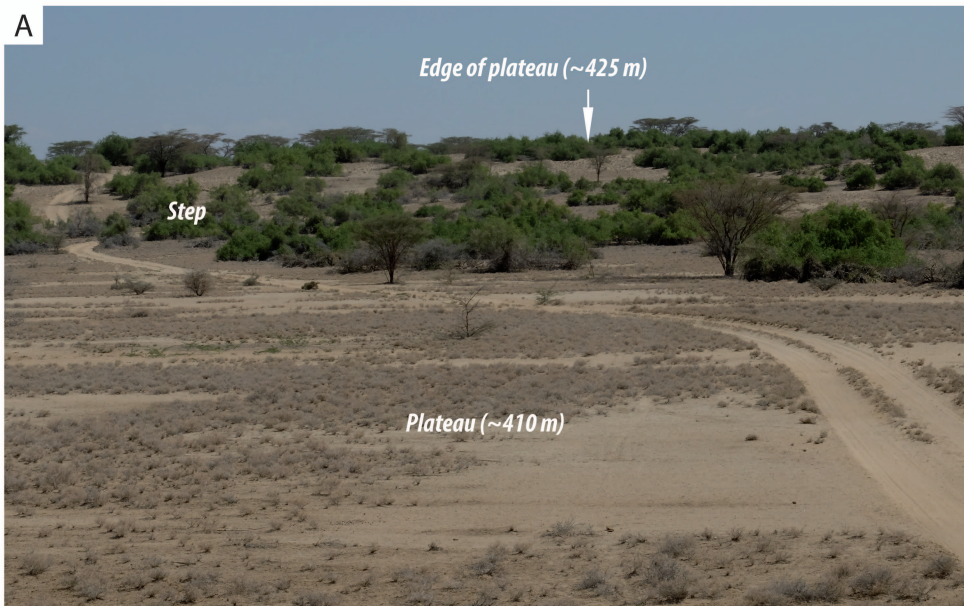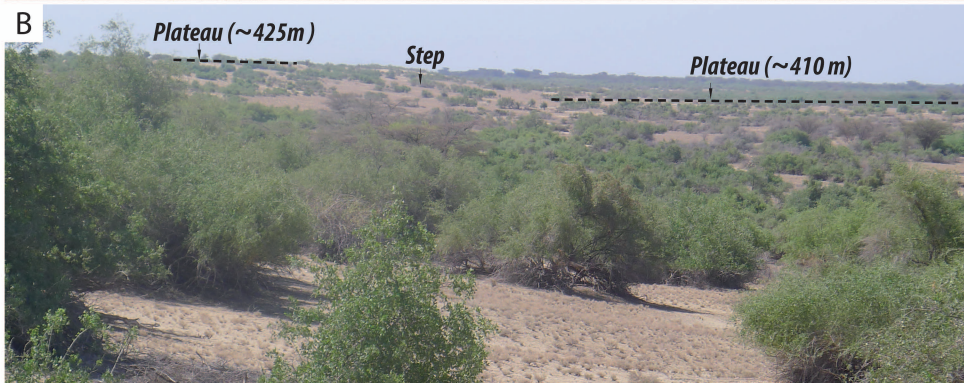

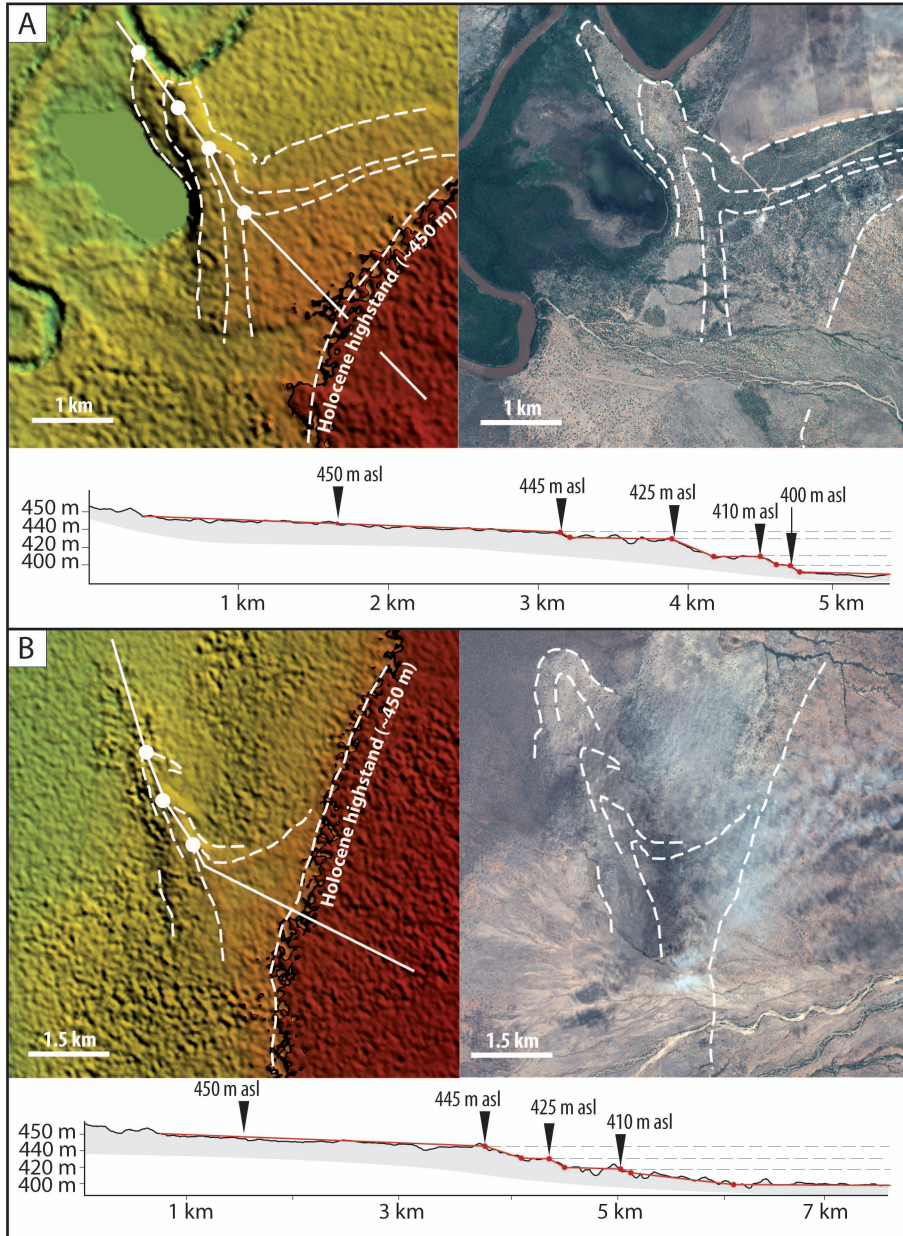



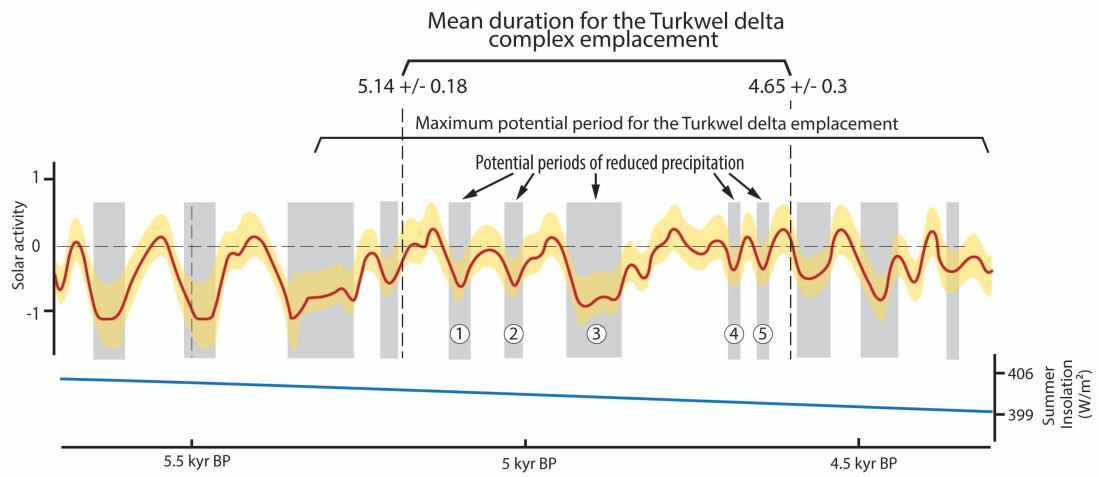

Supplement: Supplementary file [file se-2016-95-AC1-supplement.pdf]
